# Supplementary material for: Do We Need Media Guidelines When Reporting on Panic Buying? An Analysis of the Content of News Reports During the COVID-19 Pandemic
Source: Frontiers journal article supplement (doi:10.3389/fcomm.2022.867511), 2022-05-27
Supplement: Table_1.XLSX [file Table_1.XLSX]

## Sheet: Data sheet - Supplementary
Country	StudyQualityWHO	PGovAct	PExpert	PPsychol	PFake	PRemedial	PImpact	NTitle	NCauses	NImages	NSimilar	NBPublic	NBRetail	NBGovt	NDrama	APositive	ANegative	StudyQualityArafat	PBInTitle	DiscPBInTitle	PBProvocTitle	PBImageOrVideo	CausesTotal	CauseCOVIDSpike	CauseEnvironment	CauseSupplyScarcity	CauseIndPsychology	CauseSocialContagion	CauseSocialMedia	CauseNewsMedia	CauseViciousCycle	CauseLockdowns	CausePriming	CauseWarOrUnrest	CausePriceChange	CauseLabourCOVID	CauseLabourOther	CauseChildren	CauseAdvertising	CauseCulture	CauseGovtNonCOVID	CauseEconDifficulties	CauseGovtPoorComm	CauseGovtDistrust	CausePoorRetailPredict	ControlAny	ControlMediaAdvice	ControlGovtAdvice	ControlBusRetailAdvice
2	3	0	1	1	0	1	0	1	1	0	0	1	0	0	0	3	3	0	1	1	2	2	3	2	2	1	1	1	2	2	2	2	2	2	2	2	2	2	2	2	2	2	2	2	2	1	1	2	2
2	0	0	0	0	0	0	0	0	1	1	0	0	0	0	0	0	2	-2	2	2	2	1	1	2	2	1	2	2	2	2	2	2	2	2	2	2	2	2	2	2	2	2	2	2	2	2	2	2	2
2	2	0	1	0	0	1	0	0	1	0	0	0	1	0	0	2	2	0	2	2	2	2	2	2	2	1	2	2	2	2	2	2	2	2	1	2	2	2	2	2	2	2	2	2	2	1	1	2	2
2	3	1	1	1	0	1	1	1	1	0	0	0	0	0	0	5	2	3	1	1	2	2	3	2	2	1	1	2	2	2	1	2	2	2	2	2	2	2	2	2	2	2	2	2	2	1	1	1	2
2	2	0	1	1	0	1	0	1	1	1	0	0	0	0	0	3	3	0	1	1	2	1	3	1	2	1	1	2	2	2	2	2	2	2	2	2	2	2	2	2	2	2	2	2	2	1	1	2	2
2	2	0	0	0	0	0	0	1	1	1	0	0	0	0	1	0	4	-4	1	2	1	1	3	1	2	1	2	2	2	2	2	2	2	2	2	2	2	2	2	2	2	1	2	2	2	2	2	2	2
3	2	1	0	1	0	1	1	0	1	1	0	1	0	0	0	4	3	1	2	2	2	1	5	2	1	1	1	1	2	2	1	2	2	2	2	2	2	2	2	2	2	2	2	2	2	1	2	1	2
3	2	0	1	0	0	1	1	0	0	1	0	1	0	0	0	3	2	1	2	1	2	1	3	2	1	2	2	1	2	2	1	2	2	2	2	2	2	2	2	2	2	2	2	2	2	1	1	2	2
3	2	1	0	0	0	1	1	1	0	0	0	0	0	0	0	3	1	2	1	1	2	2	2	2	1	2	2	2	2	2	1	2	2	2	2	2	2	2	2	2	2	2	2	2	2	1	2	1	2
3	1	1	0	0	0	1	1	0	0	1	0	0	0	0	0	3	1	2	2	2	2	1	2	2	1	2	2	2	2	2	1	2	2	2	2	2	2	2	2	2	2	2	2	2	2	1	2	1	1
3	2	0	0	0	1	1	1	0	0	1	0	1	0	0	0	3	2	1	2	2	2	1	4	2	1	2	2	1	1	2	1	2	2	2	2	2	2	2	2	2	2	2	2	2	2	1	2	2	2
4	2	0	0	0	0	0	0	0	1	0	0	0	0	1	0	0	2	-2	2	2	2	2	4	1	1	1	2	2	2	2	2	2	2	2	2	2	2	2	2	2	2	2	1	2	2	2	2	2	2
4	2	1	0	0	0	1	0	1	0	0	0	0	0	1	0	2	2	0	1	1	2	2	1	2	2	2	2	2	2	2	2	2	2	2	2	2	2	2	2	2	2	2	1	2	2	1	2	1	1
4	3	0	0	0	1	1	0	0	0	0	0	0	0	1	0	2	1	1	2	2	2	2	3	2	2	2	2	2	1	2	2	2	2	1	2	2	2	2	2	2	2	2	1	2	2	1	2	2	1
4	0	0	0	0	0	0	0	0	1	1	1	0	0	0	0	0	3	-3	2	2	2	1	2	1	2	2	2	2	2	2	2	1	2	2	2	2	2	2	2	2	2	2	2	2	2	2	2	2	2
4	1	0	0	0	0	0	0	0	1	1	0	0	1	1	0	0	4	-4	2	2	2	1	5	1	1	2	2	2	2	2	2	2	2	1	1	2	2	2	2	2	2	2	1	2	2	2	2	2	2
5	3	0	1	0	0	1	0	1	0	1	0	0	1	0	1	2	4	-2	1	2	1	1	3	2	2	2	2	2	2	2	2	2	2	2	1	2	2	2	1	1	2	2	2	2	2	1	1	2	2
5	3	1	0	0	1	1	1	1	1	1	0	1	0	1	1	4	6	-2	1	2	1	1	6	2	2	1	2	1	1	2	1	2	2	2	2	2	2	1	2	2	1	2	2	2	2	1	2	1	2
5	3	1	0	1	0	1	0	0	1	0	0	0	0	1	0	3	2	1	2	2	2	2	5	2	2	1	1	2	2	2	2	2	1	2	2	2	2	2	2	2	1	2	1	2	2	1	2	1	1
5	1	0	0	0	0	0	0	0	1	1	0	0	0	1	0	0	3	-3	2	1	2	1	3	2	2	1	2	2	2	2	2	2	2	2	2	1	2	2	2	2	1	2	2	2	2	2	2	2	2
5	4	0	0	0	0	1	0	1	1	0	0	0	0	1	1	1	4	-3	1	2	1	2	3	2	2	1	2	2	2	2	2	2	1	2	2	2	2	2	2	2	1	2	2	2	2	1	2	2	2
5	1	0	0	0	0	1	0	0	1	1	0	0	0	1	0	1	3	-2	2	2	2	1	2	2	2	1	2	2	2	2	2	2	2	2	2	2	2	2	2	2	1	2	2	2	2	1	2	2	2
5	2	1	0	0	0	1	0	0	1	1	0	0	0	1	0	2	3	-1	2	2	2	1	3	2	2	1	2	2	2	1	2	2	2	2	2	2	2	2	2	2	1	2	2	2	2	1	2	1	2
5	0	0	0	0	0	0	0	0	1	1	0	0	0	0	0	0	2	-2	2	1	2	1	2	2	2	1	2	2	2	2	2	2	2	2	2	1	2	2	2	2	2	2	2	2	2	2	2	2	2
5	1	0	0	0	0	0	0	1	0	1	0	0	0	1	1	0	4	-4	1	2	1	1	2	2	2	2	2	2	2	2	2	2	2	2	2	1	2	2	2	2	1	2	2	2	2	2	2	2	2
5	1	0	0	0	0	0	1	1	1	0	0	0	0	0	0	1	2	-1	1	1	2	2	2	2	2	1	2	2	2	2	1	2	2	2	2	2	2	2	2	2	2	2	2	2	2	2	2	2	2
5	2	0	0	0	0	1	1	1	0	1	1	0	0	0	1	2	4	-2	1	2	1	1	2	2	2	2	2	2	2	2	1	1	2	2	2	2	2	2	2	2	2	2	2	2	2	1	2	2	1
5	3	0	0	0	0	1	1	1	0	0	0	0	0	0	1	2	2	0	1	2	1	2	2	2	2	2	2	2	2	2	1	2	2	2	2	1	2	2	2	2	2	2	2	2	2	1	2	2	1
5	1	0	0	0	0	0	0	1	1	1	0	0	0	0	1	0	4	-4	1	2	1	1	2	1	2	2	2	2	2	2	2	2	2	2	2	1	2	2	2	2	2	2	2	2	2	2	2	2	2
5	3	0	0	0	0	1	0	1	1	1	0	0	0	1	1	1	5	-4	1	2	1	1	3	2	2	1	2	2	2	2	2	2	2	2	2	1	2	2	2	2	1	2	2	2	2	1	2	2	2
5	1	0	0	0	0	1	0	0	1	1	0	0	1	0	0	1	3	-2	2	2	2	1	2	1	2	2	2	2	2	2	2	2	2	2	1	2	2	2	2	2	2	2	2	2	2	1	2	2	2
5	4	0	1	0	0	1	1	1	1	0	0	0	0	1	1	3	4	-1	1	2	1	2	4	1	2	1	2	2	2	2	1	2	2	2	2	2	2	2	2	2	1	2	2	2	2	1	1	2	2
5	1	0	0	0	0	1	0	1	0	1	1	0	0	0	0	1	3	-2	1	1	2	1	1	2	2	2	2	2	2	2	2	1	2	2	2	2	2	2	2	2	2	2	2	2	2	1	2	2	2
5	3	0	0	0	0	1	0	1	1	1	0	0	0	1	1	1	5	-4	1	2	1	1	3	1	2	1	2	2	2	2	2	2	2	2	2	2	2	2	2	2	1	2	2	2	2	1	2	2	2
5	3	0	1	0	0	1	0	0	1	0	0	0	0	0	0	2	1	1	2	1	2	2	3	1	2	1	2	2	2	2	2	2	2	2	2	1	2	2	2	2	2	2	2	2	2	1	1	2	2
6	3	0	0	0	0	0	0	1	1	0	0	0	0	1	1	0	4	-4	1	2	1	2	3	2	2	1	2	2	2	2	2	2	2	2	2	2	2	2	2	2	1	1	2	2	2	2	2	2	2
6	1	0	0	0	0	0	0	0	1	0	1	0	0	0	0	0	2	-2	2	2	2	2	2	1	2	2	2	2	2	2	2	1	2	2	2	2	2	2	2	2	2	2	2	2	2	2	2	2	2
6	2	0	0	1	0	0	0	1	1	1	0	0	0	0	1	1	4	-3	1	2	1	1	3	1	2	2	1	2	2	2	2	2	2	2	2	2	2	1	2	2	2	2	2	2	2	2	2	2	2
6	2	0	0	0	1	0	0	1	0	1	1	0	0	1	1	1	5	-4	1	2	1	1	3	2	2	2	2	2	1	2	2	1	2	2	2	2	2	2	2	2	2	2	1	2	2	2	2	2	2
6	3	1	0	0	1	1	0	1	1	1	1	0	0	0	1	3	5	-2	1	2	1	1	3	1	2	2	2	2	1	2	2	1	2	2	2	2	2	2	2	2	2	2	2	2	2	1	2	1	2
6	3	0	1	0	1	1	1	1	1	1	1	0	0	0	1	4	5	-1	1	2	1	1	4	1	2	2	2	2	1	2	1	1	2	2	2	2	2	2	2	2	2	2	2	2	2	1	1	2	2
6	3	0	1	1	0	1	0	1	1	0	0	0	0	0	1	3	3	0	1	2	1	2	2	2	2	1	1	2	2	2	2	2	2	2	2	2	2	2	2	2	2	2	2	2	2	1	1	2	2
6	2	0	0	0	1	0	0	1	0	1	0	0	0	0	1	1	3	-2	1	2	1	1	3	2	2	2	2	2	1	2	2	2	2	2	2	1	1	2	2	2	2	2	2	2	2	2	2	2	2
6	3	0	0	0	1	0	0	1	1	0	1	0	0	0	1	1	4	-3	1	2	1	2	3	1	2	2	2	2	1	2	2	1	2	2	2	2	2	2	2	2	2	2	2	2	2	2	2	2	2
6	2	0	0	0	1	0	0	1	0	1	1	1	0	0	1	1	5	-4	1	2	1	1	3	2	2	2	2	1	1	2	2	1	2	2	2	2	2	2	2	2	2	2	2	2	2	2	2	2	2
6	1	0	0	0	0	0	0	1	0	1	1	0	0	0	1	0	4	-4	1	2	1	1	1	2	2	2	2	2	2	2	2	1	2	2	2	2	2	2	2	2	2	2	2	2	2	2	2	2	2
6	2	0	0	0	1	0	0	1	1	1	1	0	0	0	1	1	5	-4	1	2	1	1	3	1	2	2	2	2	1	2	2	1	2	2	2	2	2	2	2	2	2	2	2	2	2	2	2	2	2
6	2	0	1	1	1	1	0	1	0	1	0	1	0	0	0	4	3	1	1	1	2	1	3	2	2	2	1	1	1	2	2	2	2	2	2	2	2	2	2	2	2	2	2	2	2	1	1	2	2
6	2	1	0	0	0	1	0	1	0	1	1	0	0	0	1	2	4	-2	1	2	1	1	1	2	2	2	2	2	2	2	2	1	2	2	2	2	2	2	2	2	2	2	2	2	2	1	2	1	2
6	1	1	0	0	0	1	0	1	1	1	0	0	0	0	0	2	3	-1	1	1	2	1	1	1	2	2	2	2	2	2	2	2	2	2	2	2	2	2	2	2	2	2	2	2	2	1	2	1	2
6	3	0	1	0	0	1	1	1	1	1	0	0	0	0	1	3	4	-1	1	2	1	1	3	1	2	1	2	2	2	2	1	2	2	2	2	2	2	2	2	2	2	2	2	2	2	1	1	2	2
7	0	0	0	0	0	0	0	1	0	1	1	0	0	0	0	0	3	-3	1	1	2	1	2	2	2	2	2	2	2	1	2	1	2	2	2	2	2	2	2	2	2	2	2	2	2	2	2	2	2
7	1	1	0	0	0	1	1	1	0	1	1	0	0	0	0	3	3	0	1	1	2	1	2	2	2	2	2	2	2	2	1	1	2	2	2	2	2	2	2	2	2	2	2	2	2	1	2	1	1
7	1	0	0	1	0	0	0	1	0	1	1	0	0	0	1	1	4	-3	1	2	1	1	2	2	2	2	1	2	2	2	2	1	2	2	2	2	2	2	2	2	2	2	2	2	2	2	2	2	2
8	2	0	0	1	0	0	0	1	1	1	1	0	0	0	1	1	5	-4	1	2	1	1	3	1	2	2	1	2	2	2	2	1	2	2	2	2	2	2	2	2	2	2	2	2	2	2	2	2	2
8	2	0	0	0	0	0	0	1	1	1	1	0	1	0	1	0	6	-6	1	2	1	1	3	1	2	2	2	2	2	2	2	1	2	2	1	2	2	2	2	2	2	2	2	2	2	2	2	2	2
8	2	0	0	0	1	0	0	1	1	1	1	0	0	0	1	1	5	-4	1	2	1	1	4	1	2	2	2	2	1	2	2	1	1	2	2	2	2	2	2	2	2	2	2	2	2	2	2	2	2
8	2	0	0	0	0	1	0	1	1	1	1	0	0	0	1	1	5	-4	1	2	1	1	2	1	2	2	2	2	2	2	2	1	2	2	2	2	2	2	2	2	2	2	2	2	2	1	2	2	2
8	1	0	0	0	0	0	0	1	0	1	1	0	0	1	1	0	5	-5	1	2	1	1	2	2	2	2	2	2	2	2	2	1	2	2	2	2	2	2	2	2	2	2	2	1	2	2	2	2	2
8	0	0	0	0	0	0	0	0	1	1	1	0	0	0	0	0	3	-3	2	1	2	1	2	1	1	2	2	2	2	2	2	1	2	2	2	2	2	2	2	2	2	2	2	2	2	2	2	2	2
8	1	0	0	0	0	0	0	1	0	1	1	0	0	0	1	0	4	-4	1	2	1	1	1	2	2	2	2	2	2	2	2	1	2	2	2	2	2	2	2	2	2	2	2	2	2	2	2	2	2
8	2	0	0	0	0	0	0	1	0	0	1	0	0	0	1	0	3	-3	1	2	1	2	2	2	2	2	2	2	2	2	2	1	1	2	2	2	2	2	2	2	2	2	2	2	2	2	2	2	2
8	3	0	0	0	1	1	0	1	1	0	0	0	0	0	1	2	3	-1	1	2	1	2	2	1	2	2	2	2	1	2	2	2	2	2	2	2	2	2	2	2	2	2	2	2	2	1	2	2	2
8	2	0	0	0	0	0	0	1	1	0	0	0	0	0	1	0	3	-3	1	2	1	2	1	1	2	2	2	2	2	2	2	2	2	2	2	2	2	2	2	2	2	2	2	2	2	2	2	2	2
9	2	1	0	0	0	1	0	1	1	1	1	0	0	0	1	2	5	-3	1	2	1	1	2	1	2	2	2	2	2	2	2	1	2	2	2	2	2	2	2	2	2	2	2	2	2	1	2	1	2
10	4	1	0	1	0	1	0	1	1	0	1	1	0	0	1	3	5	-2	1	2	1	2	4	1	2	2	1	1	2	2	2	1	2	2	2	2	2	2	2	2	2	2	2	2	2	1	2	2	2
10	3	0	0	0	0	0	1	1	1	0	1	0	0	0	1	1	4	-3	1	2	1	2	3	1	2	2	2	2	2	2	1	1	2	2	2	2	2	2	2	2	2	2	2	2	2	2	2	2	2
11	3	1	0	0	1	1	0	1	1	0	1	0	0	0	0	3	3	0	1	1	2	2	3	1	2	2	2	2	1	2	2	1	2	2	2	2	2	2	2	2	2	2	2	2	2	1	2	1	1
12	1	0	0	0	0	0	0	1	0	0	1	0	0	0	0	0	2	-2	1	1	2	2	1	2	2	2	2	2	2	2	2	1	2	2	2	2	2	2	2	2	2	2	2	2	2	2	2	2	2
13	3	1	0	0	1	1	0	1	1	1	1	0	0	0	1	3	5	-2	1	2	1	1	3	1	2	2	2	2	1	2	2	1	2	2	2	2	2	2	2	2	2	2	2	2	2	1	2	1	2
[truncated: 8 more columns]
